# Supplementary material
Source: publisher site journal article supplement (http://www.spandidos-publications.com/6226/downloadSupplementary)
Supplement: Supplementary file 1 [file downloadSupplementary]

## Sheet: Table SI
Table SI. The detailed information of AS patients
Sex	Age (years)	HLA-B27 test	Course of AS
Female	32	Non	15 years
Male	28	Negative	11 years
Male	33	Negative	17 years
Female	22	Positive	10 years
Male	43	Positive	6 years
